# Supplementary material
Source: ML conference proceedings conference paper supplement (https://openaccess.thecvf.com/content/CVPR2021/html/Chen_Distilling_Audio-Visual_Knowledge_CVPR_2021_paper.html)
Supplement: Supplementary file 1 [file Chen_Distilling_Audio-Visual_Knowledge_CVPR_2021_supplemental.pdf]

# Distilling Audio-Visual Knowledge by Compositional Contrastive Learning (Supplementary)

Yanbei Chen<sup>1</sup>, Yongqin Xian<sup>2</sup>, A. Sophia Koepke<sup>1</sup>, Ying Shan<sup>3</sup>, Zeynep Akata<sup>1,2,4</sup>

<sup>1</sup>University of Tübingen <sup>2</sup>MPI for Informatics <sup>3</sup>Tencent PCG <sup>4</sup>MPI for Intelligent Systems  
 {yanbei.chen, a-sophia.koepke, zeynep.akata}@uni-tuebingen.de, yxian@mpi-inf.mpg.de

## A. Additional Algorithmic Details

Algorithm A gives an overview of our compositional contrastive learning (CCL) algorithm for audio-visual distillation. From an information-theoretic point of view, CCL distills audio-visual knowledge from the teacher networks by maximising the mutual information between the student network  $\theta_{3D-CNN}$  and the teacher networks  $\theta_{1D-CNN}$ ,  $\theta_{2D-CNN}$  and the composition functions  $\mathcal{F}_{av}$ ,  $\mathcal{F}_{iv}$ . While the multi-class contrastive loss  $\mathcal{L}_{nce}$  contrasts the feature similarity, the Jensen–Shannon divergence  $\mathcal{L}_{JSD}$  contrasts the prediction similarity, which together maximise the similarities between the cross-modal positive pairs from the same class. Importantly, class labels are introduced into both loss terms and the composition functions (Figure A), thus ensuring to transfer the task-relevant knowledge to the student network.

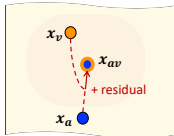

Figure A. Illustration of the compositional embedding  $x_{av}$ . The composition function uses residual learning to modify a teacher embedding  $x_a$ , which shifts  $x_a$  towards the video embedding  $x_v$ , resulting in the compositional embedding  $x_{av}$ . Given the classification constraint  $\mathcal{L}_{ce}$ ,  $x_{av}$  is enforced to share to the same video class as  $x_v$ , thus closing the possible cross-modal semantic gap.

## B. Additional Analysis and Results

**Analysis of Cross-Modal Correspondence.** Here, we first manually analyse the audio-video correspondence on UCF51. For each video, we compute the top-10 predicted audio classes using the audio network. For each video class, we compute the top-10 associated audio classes based on how frequently they are predicted as the top-10 audio classes. We summarise the video classes and their top-10 associated audio classes in Tables D, E, F, where we manually classify the audio-video correspondence as highly, weakly and not correlated, as summarised in Table A. Moreover, we give some qualitative examples of the image-video correspondence (Figure B). As shown, the vi-

| audio-video correspondence | # video classes | proportion (%) |
|----------------------------|-----------------|----------------|
| highly                     | 15              | 29.4           |
| weakly                     | 15              | 29.4           |
| not                        | 21              | 41.2           |

Table A. Statistics of the audio-video correspondence on UCF51.

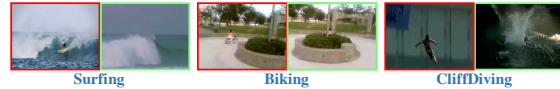

Figure B. Image-video correspondence: videos (tagged in blue) from UCF. The red/green boxes mean that the visual cues in the image frames are highly/weakly correlated to the video classes.

sual cues in image frames are generally highly or weakly related to the video content, e.g. the *sea* image is weakly correlated with the video class *skijet* due to occlusion.

*Remark.* Our analysis of the UCF51 dataset indicates the presence of a possible cross-modal semantic gap in multi-modal distillation. To empirically examine how CCL deal with this issue in practice, we evaluate CCL and its best competitor CRD using highly/weakly or not correlated audios for audio distillation. As Table B shows, on the 21 classes with not correlated audios, CRD performs on par with the baseline w/o distillation (+0.5% acc), while our CCL outperforms the baseline significantly (+3.1% acc). This suggests that our CCL can distill complementary information from audio even if it is uncorrelated with the video.

| audio-video correspondence          | baseline | CRD  | CCL         |
|-------------------------------------|----------|------|-------------|
| weak/highly correlated (30 classes) | 55.3     | 59.6 | <b>65.5</b> |
| not correlated (21 classes)         | 61.0     | 61.5 | <b>64.1</b> |

Table B. Ablation study of audio distillation on UCF51.

**Tabular Results on VGGSound.** In Table C, we provide the tabular results of audio-visual distillation on the large-scale VGGSound dataset, which includes three contrastive learning methods (CRD, CMC, CCL) in comparison to the baseline for the video recognition and video retrieval tasks.

| Task<br>Metric | Recognition |             | Retrieval   |             |             |             |
|----------------|-------------|-------------|-------------|-------------|-------------|-------------|
|                | Top1        | Top5        | R1          | R5          | R10         | R20         |
| baseline       | 19.1        | 20.3        | 22.1        | 38.5        | 47.0        | 55.8        |
| CRD            | 19.8        | 41.6        | 22.0        | 39.2        | 47.8        | 56.3        |
| CMC            | 12.6        | 30.0        | 18.3        | 34.7        | 43.1        | 52.1        |
| <b>CCL</b>     | <b>23.6</b> | <b>46.2</b> | <b>28.1</b> | <b>45.0</b> | <b>52.5</b> | <b>60.2</b> |

Table C. Evaluating audio-visual distillation on VGGSound.

**Algorithm A** Compositional Contrastive Learning (Audio-Visual Distillation)

**Require:** Video dataset  $\mathcal{D} = \{\mathbf{V}_i, y_i\}_{i=1}^N$ , the corresponding image frames  $\{\mathbf{I}_{ij}\}_{j=1}^{M_i}$  and audio recording  $\mathbf{A}_i$  for each video.

**Require:** Trainable video student network  $\theta_{3D-CNN}$ . Pre-trained audio and image teacher networks  $\theta_{1D-CNN}, \theta_{2D-CNN}$ .

- 1: **for**  $t = 1$  **to**  $max\_iter$  **do**
- 2:  $x_a \leftarrow \theta_{1D-CNN}(\mathbf{A}_i), x_i \leftarrow \theta_{2D-CNN}(\mathbf{I}_{ij}), x_v \leftarrow \theta_{3D-CNN}(\mathbf{V}_i)$  {obtain unimodal audio, image, video embeddings}
- 3:  $x_{av} \leftarrow \mathcal{F}_{av}(x_a, x_v), x_{iv} \leftarrow \mathcal{F}_{iv}(x_i, x_v)$  {derive compositional embeddings}
- 4:  $\mathcal{L}_{ce}^v \leftarrow \mathcal{L}_{ce}(x_v, k), \mathcal{L}_{ce}^{av} \leftarrow \mathcal{L}_{ce}(x_{av}, k), \mathcal{L}_{ce}^{iv} \leftarrow \mathcal{L}_{ce}(x_{iv}, k)$  {compute video classification loss}
- 5:  $\mathcal{L}_{audio} \leftarrow \lambda \mathcal{L}_{nce}(x_v, x_a) + (1-\lambda) \mathcal{L}_{nce}(x_v, x_{av}) + JSD(P_v || P_{av})$  {compute audio distillation loss}
- 6:  $\mathcal{L}_{image} \leftarrow \lambda \mathcal{L}_{nce}(x_v, x_i) + (1-\lambda) \mathcal{L}_{nce}(x_v, x_{iv}) + JSD(P_v || P_{iv})$  {compute visual distillation loss}
- 7:  $\theta_{3D-CNN}^{t+1} \leftarrow \theta_{3D-CNN}^t - \eta \frac{\partial \mathcal{L}^v}{\partial \theta_{3D-CNN}}$ , where  $\mathcal{L}^v = \mathcal{L}_{ce}^v + \mathcal{L}_{audio} + \mathcal{L}_{image}$  {backprop on the video network}
- 8:  $\theta_{av}^{t+1} \leftarrow \theta_{av}^t - \eta \frac{\partial \mathcal{L}_{ce}^{av}}{\partial \theta_{av}}, \theta_{iv}^{t+1} \leftarrow \theta_{iv}^t - \eta \frac{\partial \mathcal{L}_{ce}^{iv}}{\partial \theta_{iv}}$  {backprop on the composition functions}
- 9: **end for**

| Video Class       | Top-10 Associated Audio Classes                                                                                                                                | Correlated |
|-------------------|----------------------------------------------------------------------------------------------------------------------------------------------------------------|------------|
| ApplyEyeMakeup    | Speech; Inside, small room; Music; Female speech, woman speaking; Vehicle; Writing; Conversation; Narration, monologue; Animal; Rustle                         | not        |
| ApplyLipstick     | Speech; Music; Inside, small room; Vehicle; Animal; Female speech, woman speaking; Narration, monologue; Conversation; Musical instrument; Writing             | not        |
| Archery           | Speech; Music; Vehicle; <b>Arrow</b> ; Inside, small room; Outside, rural or natural; Animal; Car; Door; Bird                                                  | highly     |
| BabyCrawling      | Speech; Inside, small room; Music; Animal; <b>Child speech, kid speaking; Babbling;</b> Laughter; Domestic animals, pets; Vehicle; Crying, sobbing             | weakly     |
| BalanceBeam       | Speech; Music; Vehicle; Outside, urban or manmade; Crowd; Inside, large room or hall; Inside, public space; <b>Basketball bounce;</b> Car; Animal              | weakly     |
| BandMarching      | <b>Music;</b> Speech; <b>Musical instrument; Drum; Percussion;</b> Crowd; <b>Orchestra;</b> <b>Brass instrument;</b> Vehicle; Wood block                       | highly     |
| BasketballDunk    | Music; Speech; Vehicle; <b>Basketball bounce;</b> Outside, urban or manmade; Crowd; Car; Hip hop music; Slam; Singing                                          | highly     |
| BlowDryHair       | Music; Speech; Vehicle; Inside, small room; <b>Hair dryer;</b> Vacuum cleaner; Car; Mechanical fan; Animal; Train                                              | highly     |
| BlowingCandles    | Speech; Inside, small room; Music; Animal; Laughter; Chuckle, chortle; Snicker; Child speech, kid speaking; Inside, large room or hall; Domestic animals, pets | not        |
| BodyWeightSquats  | Speech; Music; Vehicle; Inside, small room; Male speech, man speaking; Narration, monologue; Animal; Musical instrument; Car; Conversation                     | not        |
| Bowling           | Speech; Music; Vehicle; Outside, urban or manmade; Train; <b>Slam;</b> Car; Animal; Inside, public space; Inside, large room or hall                           | weakly     |
| BoxingPunchingBag | Speech; Music; <b>Slam;</b> Inside, large room or hall; Inside, small room; <b>Thump, thud;</b> Singing; Tap; Musical instrument; Vehicle                      | weakly     |
| BoxingSpeedBag    | Speech; Vehicle; Engine; Music; Car; <b>Idling;</b> Machine gun; Outside, urban or manmade; Engine starting; Motorcycle                                        | weakly     |
| BrushingTeeth     | Speech; Inside, small room; Music; Animal; <b>Toothbrush;</b> Domestic animals, pets; Scratch; Rub; Vehicle; Child speech, kid speaking                        | highly     |
| CliffDiving       | Music; Speech; Vehicle; Musical instrument; Electronic music; Car; Rock music; Outside, urban or manmade; Guitar; Trance music                                 | not        |
| CricketBowling    | Speech; Music; Vehicle; Outside, urban or manmade; Outside, rural or natural; Car; Animal; <b>Basketball bounce; Slam;</b> Inside, large room or hall          | weakly     |
| CricketShot       | Speech; Music; Vehicle; Outside, urban or manmade; Arrow; Animal; Outside, rural or natural; <b>Slam;</b> Car; <b>Thump, thud</b>                              | weakly     |

Table D. Audio-video correspondence on the UCF51 classes. Video classes (1~17), the top-10 associated audio classes, and the audio-video correlation: highly, weakly, or not correlated. Note: audio events highly/weakly correlated with the video are highlighted in red/green.

| Video Class        | Top-10 Associated Audio Classes                                                                                                                                                   | Correlated |
|--------------------|-----------------------------------------------------------------------------------------------------------------------------------------------------------------------------------|------------|
| CuttingInKitchen   | Music; Speech; Inside, small room; <b>Chopping (food)</b> ; <b>Dishes, pots, and pans</b> ;<br>Wood; Animal; <b>Chop</b> ; Vehicle; <b>Cutlery, silverware</b>                    | highly     |
| FieldHockeyPenalty | Speech; Vehicle; Music; Outside, urban or manmade; <b>Basketball bounce</b> ;<br>Car; Animal; Crowd; Outside, rural or natural; Hubbub, speech noise, speech babble               | weakly     |
| FloorGymnastics    | Music; Speech; Crowd; Cheering; Vehicle; Inside, large room or hall;<br>Children shouting; Outside, urban or manmade; Singing; Whoop                                              | not        |
| FrisbeeCatch       | Speech; Music; Vehicle; Outside, urban or manmade; Singing;<br>Car; Pop music; Hubbub, speech noise, speech babble; Boat, Water vehicle; Crowd                                    | not        |
| FrontCrawl         | Speech; Vehicle; Music; <b>Water</b> ; Stream; Car; Boat, Water vehicle;<br>Outside, urban or manmade; Splash, splatter; Outside, rural or natural                                | weakly     |
| Haircut            | Speech; Music; Inside, small room; Vehicle; Musical instrument; Animal; Inside, large room or hall;<br>Electronic music; Outside, urban or manmade; Female speech, woman speaking | not        |
| HammerThrow        | Music; Speech; Vehicle; Outside, urban or manmade; Car; Male speech,<br>man speaking; Animal; Musical instrument; Outside, rural or natural; Basketball bounce                    | not        |
| Hammering          | Music; Speech; <b>Hammer</b> ; Whack, thwack; Chop; Tools;<br>Inside, small room; Musical instrument; Vehicle; Glass                                                              | highly     |
| HandstandPushups   | Speech; Music; Vehicle; Animal; Inside, small room; Musical instrument;<br>Singing; Domestic animals, pets; Car; Pink noise                                                       | not        |
| HandstandWalking   | Speech; Music; Vehicle; Animal; Outside, urban or manmade; Car;<br>Inside, small room; Musical instrument; Singing; Domestic animals, pets                                        | not        |
| HeadMassage        | Speech; Music; Vehicle; Outside, urban or manmade; Inside, small room;<br>Musical instrument; Singing; Animal; Inside, large room or hall; Car                                    | not        |
| IceDancing         | Music; Speech; Musical instrument; Vehicle; Orchestra; Singing;<br>Theme music; Outside, urban or manmade; Television; Guitar                                                     | not        |
| Knitting           | Speech; Inside, small room; Music; Writing; Animal; Vehicle;<br>Female speech, woman speaking; Conversation; Air conditioning; Narration, monologue                               | not        |
| LongJump           | Speech; Music; Outside, urban or manmade; Vehicle; Car; Basketball bounce;<br>Inside, public space; Crowd; Hubbub, speech noise, speech babble; <b>Run</b>                        | weakly     |
| MoppingFloor       | Speech; Inside, small room; Music; Animal; Vehicle; Inside, large room or hall;<br>Male speech, man speaking; Television; Narration, monologue; Domestic animals, pets            | not        |
| ParallelBars       | Speech; Music; Crowd; Inside, large room or hall; Inside, public space;<br>Outside, urban or manmade; <b>Basketball bounce</b> ; Cheering; Slam; Vehicle                          | weakly     |
| PlayingCello       | <b>Music; Musical instrument; Bowed string instrument; Cello; String section</b> ;<br>Violin, fiddle; Double bass; <b>Classical music</b> ; Orchestra; Piano                      | highly     |

Table E. Audio-video correspondence on the UCF51 classes. Video classes (18~34), the top-10 associated audio classes, and the audio-video correlation: highly, weakly, or not correlated. Note: audio events highly/weakly correlated with the video are highlighted in red/green.

| Video Class     | Top-10 Associated Audio Classes                                                                                                                                                                               | Correlated |
|-----------------|---------------------------------------------------------------------------------------------------------------------------------------------------------------------------------------------------------------|------------|
| PlayingDaf      | Music; <b>Drum</b> ; Musical instrument; <b>Percussion</b> ; <b>Drum kit</b> ;<br>Bass drum; Snare drum; Drum roll; Wood block; <b>Rimshot</b>                                                                | highly     |
| PlayingDhol     | Music; <b>Drum</b> ; Musical instrument; <b>Percussion</b> ; <b>Drum kit</b> ; Bass drum;<br>Wood block; Speech; <b>Snare drum</b> ; <b>Tabla</b>                                                             | highly     |
| PlayingFlute    | Musical instrument; Music; <b>Flute</b> ; Wind instrument, woodwind instrument; <b>Classical music</b> ;<br>Inside, small room; <b>Bowed string instrument</b> ; Piano; Violin, fiddle; Speech                | highly     |
| PlayingSitar    | Music; Musical instrument; <b>Sitar</b> ; <b>Plucked string instrument</b> ;<br><b>Classical music</b> ; <b>Carnatic music</b> ; <b>Bowed string instrument</b> ; Speech; <b>Tabla</b> ; <b>Music of Asia</b> | highly     |
| Rafting         | Music; Speech; Vehicle; Singing; Musical instrument;<br><b>Waves, surf</b> ; Ocean; Car; <b>Waterfall</b> ; <b>Guitar</b>                                                                                     | weakly     |
| ShavingBeard    | Speech; Inside, small room; Music; Vehicle; Animal; Inside, large room or hall;<br><b>Electric shaver, electric razor</b> ; Outside, urban or manmade; Electric toothbrush; <b>Buzz</b>                       | highly     |
| Shotput         | Speech; Music; Vehicle; Outside, urban or manmade; Animal; Car;<br>Outside, rural or natural; Musical instrument; Hubbub, speech noise, speech babble; Singing                                                | not        |
| SkyDiving       | Music; Musical instrument; Singing; Punk rock; Rock music; Heavy metal;<br>Grunge; Progressive rock; Angry music; Rock and roll                                                                               | not        |
| SoccerPenalty   | Speech; Outside, urban or manmade; Music; Vehicle; <b>Basketball bounce</b> ;<br>Crowd; Slam; Male speech, man speaking; Car; Inside, public space                                                            | weakly     |
| StillRings      | Speech; Music; Vehicle; Outside, urban or manmade; Car; Inside, public space;<br><b>Basketball bounce</b> ; Crowd; Inside, large room or hall; Slam                                                           | not        |
| SumoWrestling   | Speech; Music; Crowd; Inside, large room or hall; Inside, public space;<br>Outside, urban or manmade; Cheering; Chatter; <b>Basketball bounce</b> ; <b>Slam</b>                                               | weakly     |
| Surfing         | Music; Musical instrument; Vehicle; Speech; Rock music;<br>Rock and roll; Punk rock; Guitar; Singing; Car                                                                                                     | not        |
| TableTennisShot | Speech; Music; <b>Ping</b> ; Animal; Tap; Inside, small room;<br>Inside, large room or hall; Vehicle; Whack, thwack; Bouncing                                                                                 | highly     |
| Typing          | <b>Typing</b> ; Speech; <b>Computer keyboard</b> ; <b>Typewriter</b> ; Vehicle;<br>Inside, small room; Music; Animal; Engine; Sewing machine                                                                  | highly     |
| UnevenBars      | Music; Speech; Outside, urban or manmade; Vehicle; Crowd; <b>Basketball bounce</b> ;<br>Car; Cheering; Slam; Children shouting                                                                                | not        |
| WallPushups     | Speech; Music; Inside, small room; Animal; Vehicle; Narration, monologue;<br>Male speech, man speaking; Conversation; Female speech, woman speaking; Musical instrument                                       | not        |
| WritingOnBoard  | Speech; Inside, small room; Music; Male speech, man speaking; Narration, monologue;<br>Inside, large room or hall; <b>Chopping (food)</b> ; <b>Writing</b> ; Chop; Conversation                               | weakly     |

Table F. Audio-video correspondence on the UCF51 classes. Video classes (35~51), the top-10 associated audio classes, and the audio-video correlation: highly, weakly, or not correlated. Note: audio events highly/weakly correlated with the video are highlighted in red/green.
